# Supplementary material
Source: publisher figshare collection journal article supplement (https://tandf.figshare.com/ndownloader/files/34143889)
Supplement: Supplementary file 1 [file 34143889]

**Table S1. One year all-cause mortality and mean overall survival for patients without geriatric screening.**

| **Outcomes** | **Patients without geriatric screening n=44** | **CRT + surgery n=17** | **dCRT n=7** | **Palliative radiotherapy n=16** | **No anti-tumor treatment n=4** |
| --- | --- | --- | --- | --- | --- |
| One year all-cause mortality, n (%) | 15 (34.1) | 3 (17.6) | 2 (28.6) | 8 (50.0) | 2 (50.0) |
| Mean follow-up time, months (95% CI) | 10.0 (8.8-11.1) | 11.6 (10.4-12.9) | 10.6 (8.6-12.7) | 7.9 (5.8-9.9) | 8.9 (4.0-13.8) |

Abbreviations: CI = Confidence Interval; CRT = chemoradiotherapy; dCRT = definitive chemoradiotherapy; n = number
